# Supplementary material for: ZB716, a steroidal selective estrogen receptor degrader (SERD), is orally efficacious in blocking tumor growth in mouse xenograft models
Source: PubMed Central journal article supplement (PMC5805526; doi:10.18632/oncotarget.24023), 2018-01-08
Supplement: oncotarget-09-6924-s001.pdf [file oncotarget-09-6924-s001.pdf]

# ZB716, a steroidal selective estrogen receptor degrader (SERD), is orally efficacious in blocking tumor growth in mouse xenograft models

## SUPPLEMENTARY MATERIALS

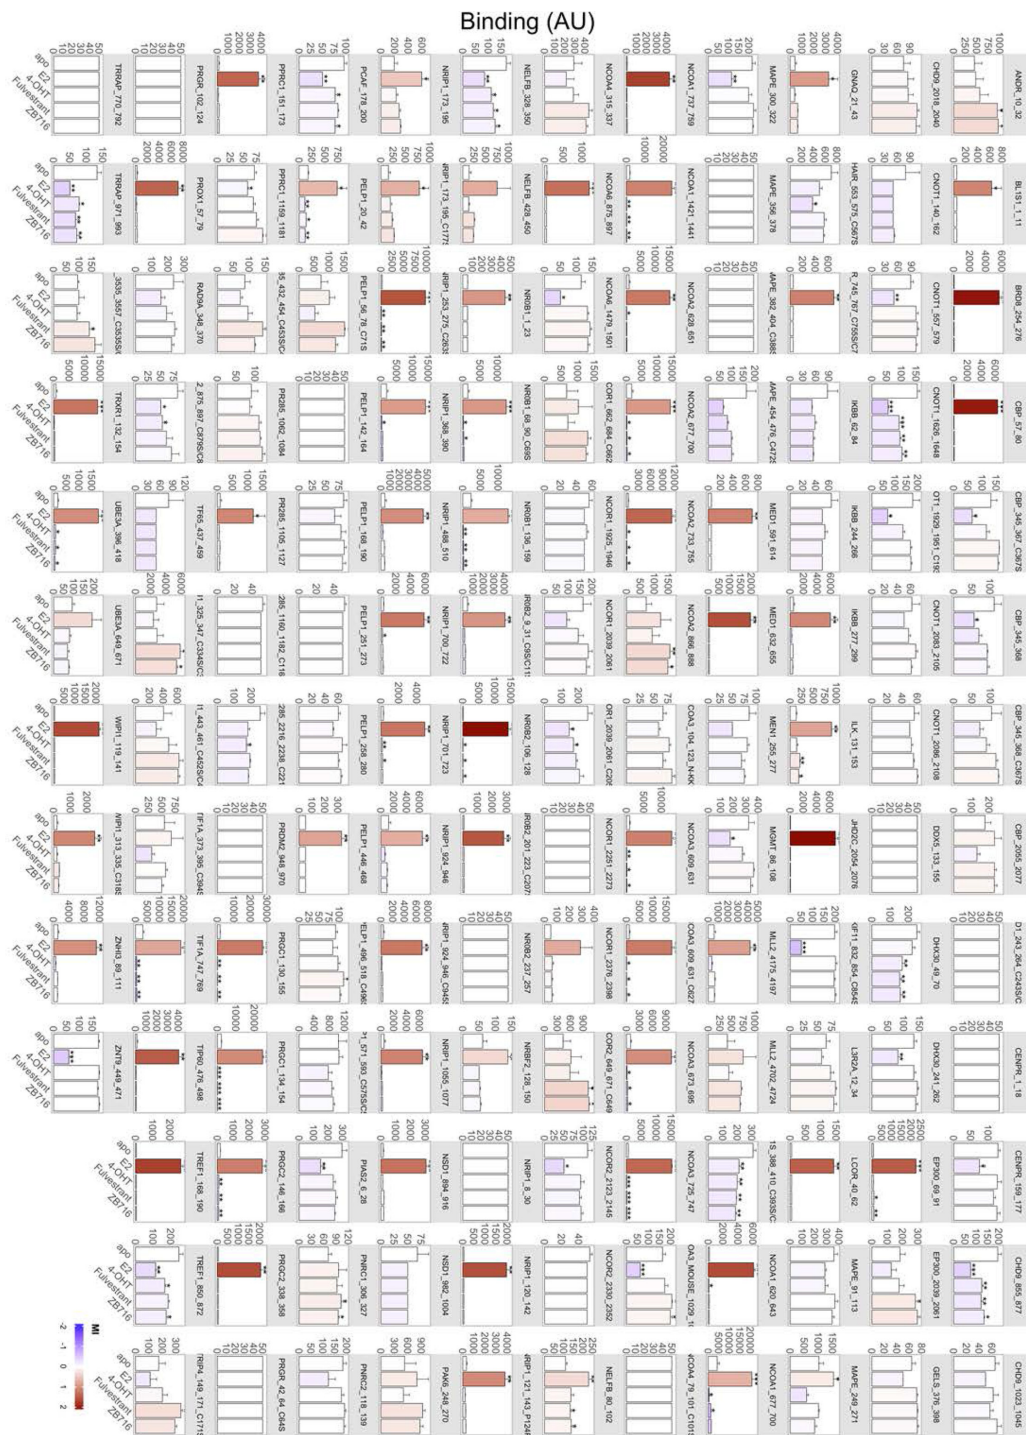

Supplementary Figure 1: Bargraphs of ER interactions with coregulators in absence (apo) or presence of indicated compound.
